# Supplementary material for: Thermo-solvatochromism of zwitterionic probes in aqueous alcohols: effects of the properties of the probe and the alcohol
Source: Royal Society of Chemistry journal article supplement (doi:10.1039/b308550c), 2003-01-01
Supplement: b308550c.doc [file b308550c.doc]

## Table S1. Polynomial dependence of ET(33), kcal/mol, on the analytical mole fraction of water in ROH-W mixtures, , calculated according to the equation: ET(33)obs = ET(33)ROH + B (cW) + C (cW)2 + D (cW)3 + E (cW)4 + F (cW)5 + G (cW)6.

| Binary Mixture | T, ****C | E**T**(33)**ROH; a** | B | C | D | E | F | G | **rmultb** | Q**2b** |
| --- | --- | --- | --- | --- | --- | --- | --- | --- | --- | --- |
| EtOH / W | 10**c** | 61.881  [- 0.055] | -4.048 | 59.082 | -156.910 | 166.112 | -55.626 |  | 0.9977 | 0.161 |
| 25**c** | 61.096  [- 0.024] | 2.251 | 12.535 | -26.878 | 14.964 | 6.217 |  | 0.9990 | 0.105 |
| 35 | 60.516  [-0.106] | 2.462 | 17.714 | - 42.052 | 31.238 |  |  | 0.9983 | 0.136 |
| 45 | 59.683  [-0.120] | 2.399 | 20.767 | - 47.877 | 34.296 |  |  | 0.9989 | 0.112 |
| 2-Me-2-PrOH / W | 25**c** | 52.839  [0.011] | 9.321 | 85.9878 | -434.080 | 963.268 | -1010.458 | 403.540 | 0.9989 | 0.244 |
| 40 | 51.193  [-0.022] | 27.512 | - 92.270 | 300.734 | - 427.564 | 209.985 |  | 0.9977 | 0.195 |
| 60 | 50.144  [-0.024] | 33.274 | - 136.450 | 415.893 | - 545.532 | 251.556 |  | 0.9971 | 0.210 |
| MeOEtOH / W | 10**c** | 60.696 [-0.044] | 2.726 | 7.553 | - 20.662 | 20.396 |  |  | 0.9998 | 0.057 |
| 25**c** | 60.00  [- 0.051] | 0.902 | 18.740 | - 38.453 | 29.026 |  |  | 0.9999 | 0.045 |
| 40 | 59.067  [-0.047] | 2.394 | 16.648 | - 37.804 | 29.515 |  |  | 0.9989 | 0.123 |
| 60 | 58.167  [-0.107] | 3.396 | 16.137 | - 38.633 | 30.145 |  |  | 0.9984 | 0.152 |

1. Calculated by regression. The values in brackets are E**T**(33)**ROH** = Experimental E**T**(33)**ROH** - calculated E**T**(33)**ROH**
2. Abbreviations: r**mult** = correlation coefficient for the multiple regression, Q = sum of the squares of the residuals.
3. Taken from ref. 4c.

## Table S2. Polynomial dependence of ET(QB), kcal/mol, on the analytical mole fraction of water in ROH-W mixtures, , calculated according to the equation: ET(QB)obs = ET(QB)ROH + B (cW) + C (cW)2 + D (cW)3 + E (cW)4 + F (cW)5 + G (cW)6.

| Binary Mixture | T, ****C | E**T**(QB)**ROH;a** | B | C | D | E | F | G | **rmultb** | Q**2b** |
| --- | --- | --- | --- | --- | --- | --- | --- | --- | --- | --- |
| EtOH / W | 10**c** | 59.689  [- 0.018] | - 0.156 | 17.095 | - 38.913 | 35.841 | - 8.438 |  | 0.9995 | 0.047 |
| 25**c** | 59.328  [0.009] | 1.488 | 2.560 | 5.701 | - 17.933 | 13.781 |  | 0.9998 | 0.034 |
| 35 | 59.151  [-0.007] | 1.078 | 10.079 | - 19.503 | 13.558 |  |  | 0.9993 | 0.052 |
| 45 | 58.884  [-0.033] | 1.453 | 5.208 | - 10.084 | 8.458 |  |  | 0.9989 | 0.062 |
| 2-Me-2-PrOH / W | 25**c** | 56.981  [- 0.009] | 2.661 | 27.089 | -123.546 | 282.026 | -304.812 | 124.280 | 0.9997 | 0.055 |
| 40 | 56.558  [-0.070] | 2.038 | 22.726 | - 44.520 | 27.533 |  |  | 0.9981 | 0.122 |
| 60 | 55.975  [-0.075] | 2.222 | 21.962 | - 41.221 | 25.037 |  |  | 0.9983 | 0.122 |
| MeOEtOH / W | 10**c** | 60.056  [0.004] | 0.929 | 1.212 | -3.374 | 6.231 |  |  | 0.9998 | 0.024 |
| 25**c** | 59.635  [- 0.001] | 0.678 | 3.589 | -7.299 | 8.207 |  |  | 0.9996 | 0.038 |
| 40 | 59.225  [-0.029] | - 0.130 | 9.881 | - 19.297 | 14.702 |  |  | 0.9983 | 0.076 |
| 60 | 58.678  [-0.029] | 0.760 | 7.191 | - 15.206 | 12.591 |  |  | 0.9967 | 0.110 |

1. Calculated by regression. The values in brackets are E**T**(QB)**ROH** = Experimental E**T**(QB)**ROH** - calculated E**T**(QB)**ROH**
2. Abbreviations: r**mult** = correlation coefficient for the multiple regression, Q = sum of the squares of the residuals.
3. Taken from ref. 4c.

## Table S3. Polynomial dependence of ET(MC), kcal/mol, on the analytical mole fraction of water in ROH-W mixtures, , calculated according to the equation: ET(MC)obs = ET(MC)ROH + B (cW) + C (cW)2 + D (cW)3 + E (cW)4 + F (cW)5 + G (cW)6.

| Binary Mixture | T, ****C | E**T**(MC)**ROH;a** | B | C | D | E | F | G | **rmultb** | Q**2b** |
| --- | --- | --- | --- | --- | --- | --- | --- | --- | --- | --- |
| EtOH / W | 10 | 56.870  [-0.051] | 2.256 | 13.731 | - 31.382 | 23.408 |  |  | 0.9968 | 0.163 |
| 25 | 56.317  [-0.043] | 1.050 | 19.593 | - 38.652 | 26.257 |  |  | 0.9990 | 0.094 |
| 40 | 55.621  [-0.093] | 2.066 | 17.248 | - 34.644 | 23.931 |  |  | 0.9994 | 0.079 |
| 60 | 54.824  [-0.054] | 2.449 | 18.024 | - 36.196 | 24.702 |  |  | 0.9997 | 0.057 |
| 2-Me-2-PrOH / W | 25 | 49.373  [0.051] | 21.546 | - 55.962 | 160.310 | - 210.542 | 99.539 |  | 0.9992 | 0.149 |
| 40 | 48.970  [0.030] | 17.019 | - 26.988 | 85.511 | - 125.731 | 65.034 |  | 0.9988 | 0.190 |
| 60 | 48.596  [0.074] | 17.602 | - 45.089 | 139.547 | - 181.620 | 84.784 |  | 0.9993 | 0.150 |
| MeOEtOH / W | 10 | 56.250  [-0.042] | 0.384 | 22.661 | - 46.208 | 31.643 |  |  | 0.9977 | 0.141 |
| 25 | 55.481  [-0.063] | 1.670 | 18.326 | - 39.148 | 28.090 |  |  | 0.9974 | 0.161 |
| 40 | 54.814  [-0.028] | 2.160 | 15.358 | - 32.928 | 24.665 |  |  | 0.9989 | 0.108 |
| 60 | 53.880  [-0.070] | 3.174 | 13.407 | - 29.860 | 23.160 |  |  | 0.9989 | 0.117 |

1. Calculated by regression. The values in brackets are E**T**(MC)**ROH** = Experimental E**T**(MC)**ROH** - calculated E**T**(MC)**ROH**
2. Abbreviations: r**mult** = correlation coefficient for the multiple regression, Q = sum of the squares of the residuals.
